# Supplementary material for: Mechanistic insights into RNA surveillance by the canonical poly(A) polymerase Pla1 of the MTREC complex
Source: Springer Nature journal article supplement (doi:10.1038/s41467-023-36402-6), 2023-02-11
Supplement: MOESM1 [file 41467_2023_36402_MOESM1_ESM-3.pdf]

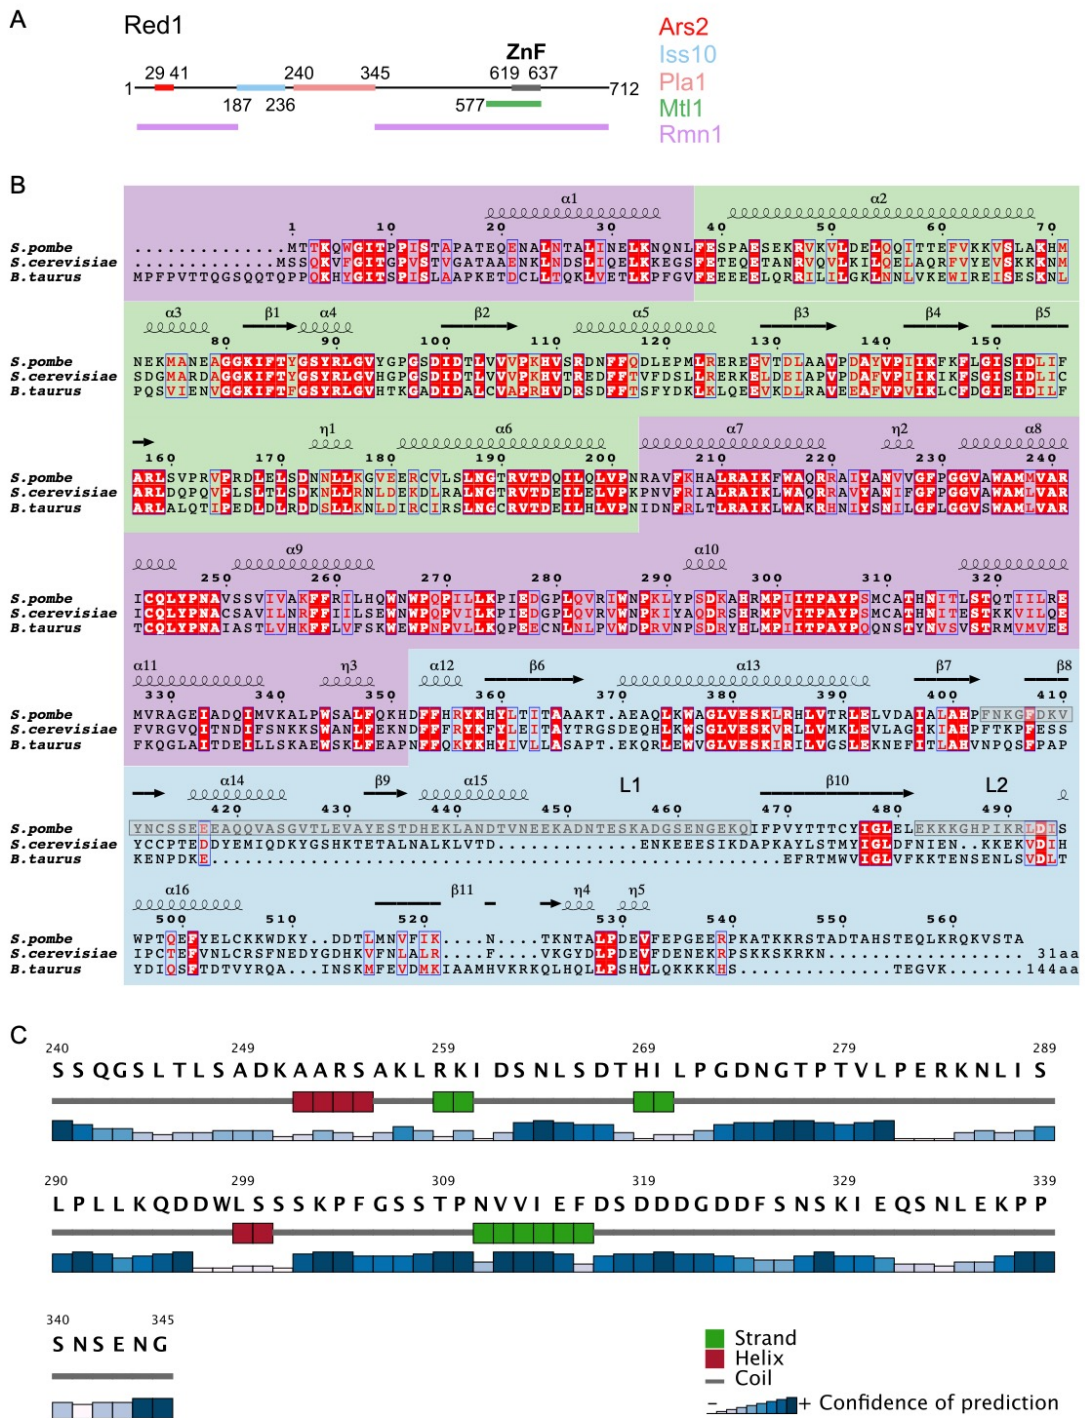

Supplementary Figure 1. Interaction regions of MTREC components within Red1, sequence alignment of Pla1 and secondary structure prediction of Red1<sub>240-345</sub>

(A) Schematic representation of different regions of Red1 interacting with other components of MTREC. (B) Sequence alignment of Pla1 from *S. pombe* and its homologues from *S. cerevisiae* (Pap1) and *B. taurus* (PAP) are shown. Residues which are identical are highlighted in red while those that are highly similar are colored in red and boxed in blue. 31 and 144 amino acids (aa) at the C-termini of Pap1 and PAP are not shown in the alignment. Secondary structure and sequence numbering with respect to Pla1 is shown on top of the sequence alignment. The NTD, MD and RRM domain of Pla1 are highlighted in green, purple and blue respectively. Loops L1 and L2 are marked in grey. (C) Secondary structure prediction of Red1 residues 240-345 using PSIPRED v4.0.<sup>1</sup>

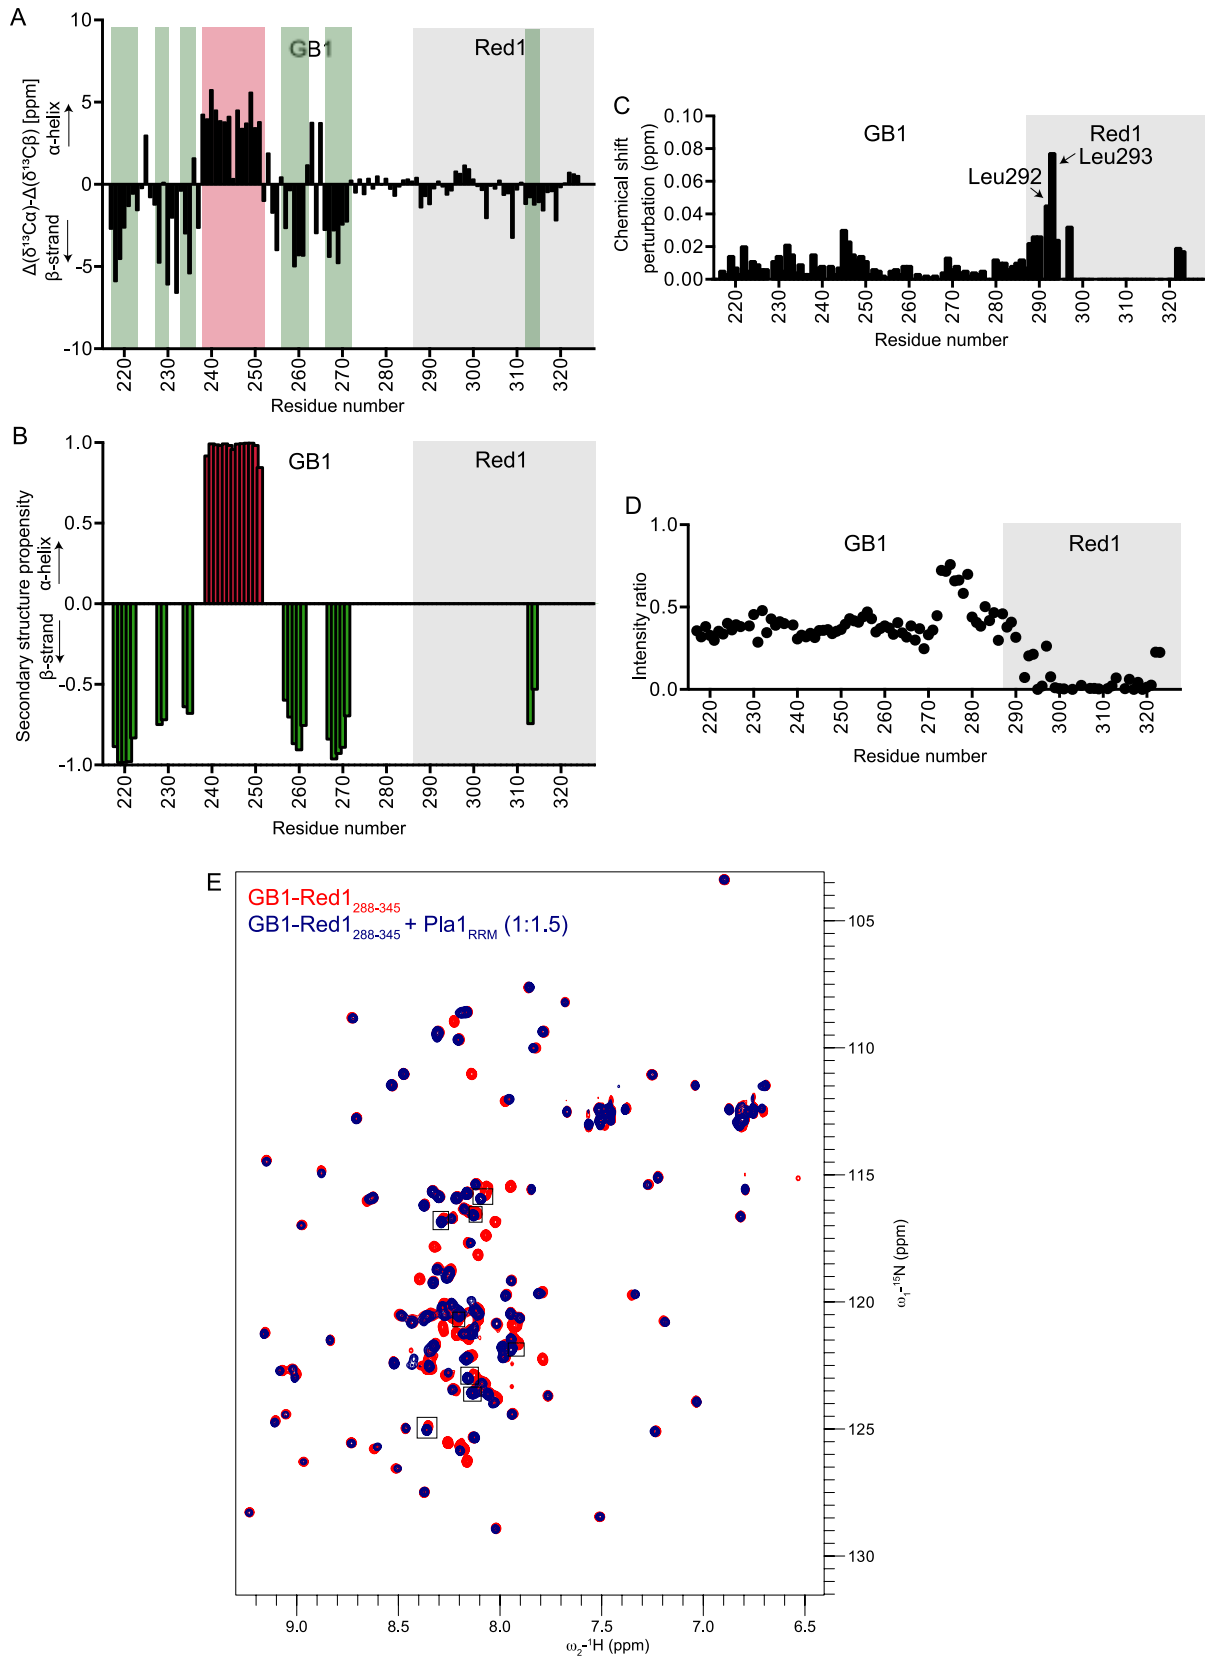

**Supplementary Figure 2. NMR analyses of Red1**

(A)  $^{13}\text{C}$  chemical-shift deviations of  $\text{C}_\alpha$  and  $\text{C}_\beta$  atoms with respect to random-coil chemical shift values for GB1-tagged Red1<sub>288-322</sub> are shown, where positive and negative deviations indicate  $\alpha$ -helical or  $\beta$ -strand propensity, respectively. (B) Secondary structure propensity of GB1-tagged Red1<sub>288-322</sub> as calculated by TALOS+<sup>2</sup> with  $\alpha$ -helices and  $\beta$ -strands colored in red and green, respectively. Secondary structure elements predicted by TALOS+ are also marked in panel A. (C) Chemical shift perturbations arising in GB1-tagged Red1<sub>288-322</sub> in the presence of 1.5-fold molar excess of Pla1<sub>RRM</sub> domain. Residues belonging to Red1 are highlighted in grey. Minor CSPs are observed in the GB1 tag while more pronounced CSPs occur at the N-terminus of Red1 (residues Leu292, Leu293). (D) Intensity ratios of Red1<sub>288-322</sub> + Pla1<sub>RRM</sub> compared to free Red1<sub>288-322</sub> are plotted against residue number. (E) Overlay of  $^1\text{H}$ ,  $^{15}\text{N}$ -HSQC NMR spectra of GB1-tagged Red1<sub>288-345</sub> in the absence (red) and presence (blue) of 1.5-fold molar excess of Pla1<sub>RRM</sub> domain is shown. Additional Red1 residues which show minor chemical shift perturbations in comparison to GB1-tagged Red1<sub>288-322</sub> (**Figure 1D**) are boxed.

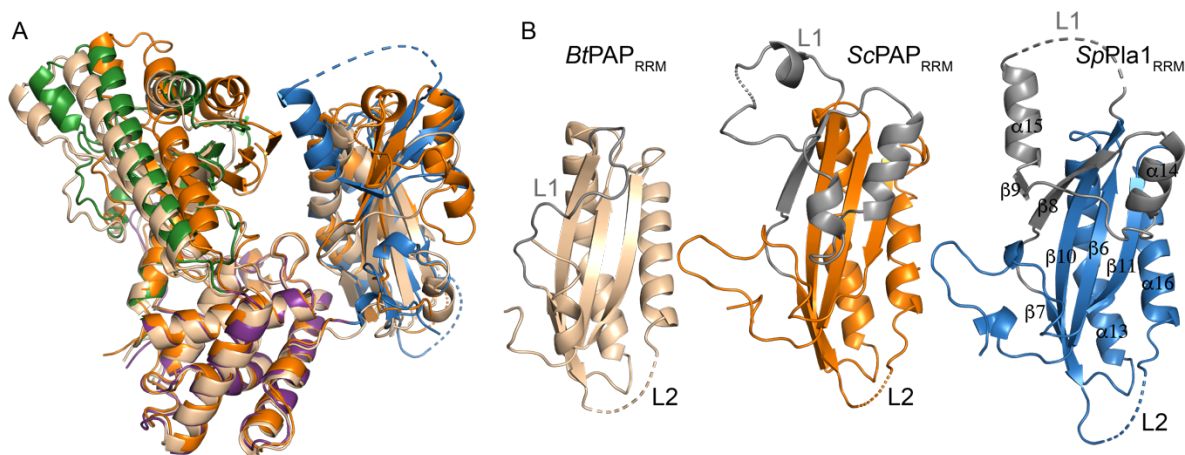

### Supplementary Figure 3. Comparison of Pla1 with its homologues

(A) Superposition of crystal structures of Pla1 apo (color scheme based on Figure 1A) with *S. cerevisiae* Pap1 (PDB ID: 2Q66, orange) and mammalian PAP (PDB ID: 1Q79, wheat) based on an alignment on the MD. A displacement of the NTD and RRM domains shows the flexibility of the domain arrangement. (B) Similar views of the RRM domains of Pla1 and its homologues. Positions of loops L1 and L2 are marked, and L1 shown in grey. L1 is severely extended in yeast when compared to mammals, and partially blocks the canonical RNA binding  $\beta$ -sheet interface.

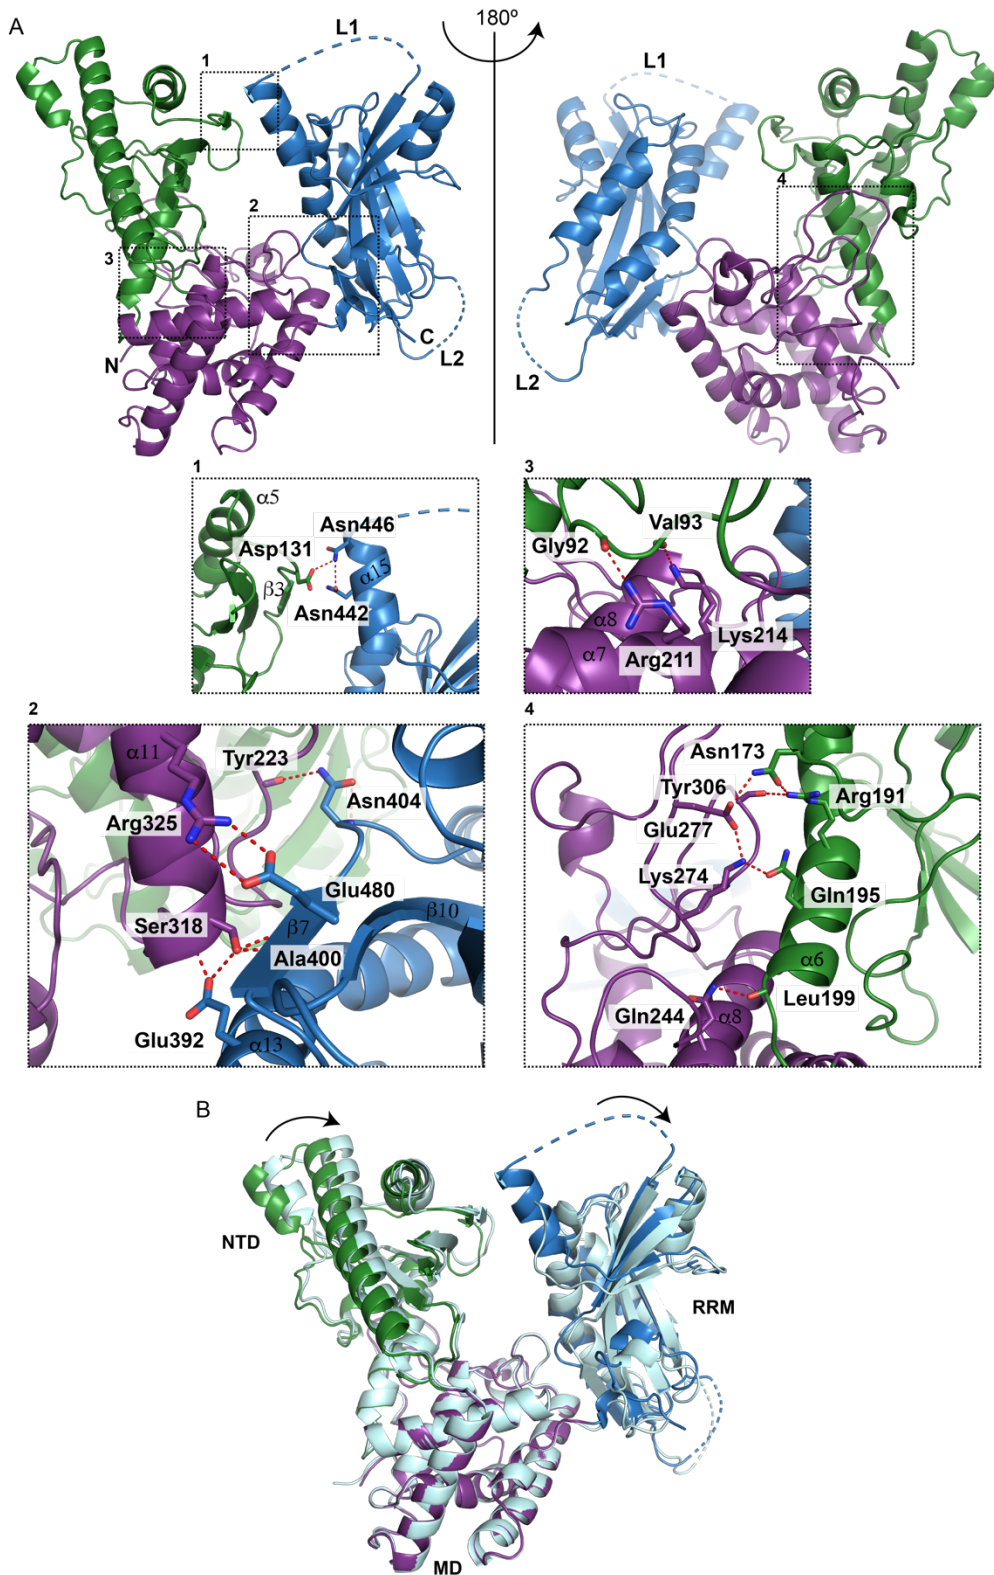

#### Supplementary Figure 4. Crystal structure of Pla1

(A). Pla1 NTD, MD and RRM domains are held together by four different interfaces which are shown in the insets. Briefly, inset 1 shows that the NTD and RRM domain

are connected via salt bridges between side chains of Asp131, Asn442 and Asn446. Inset 2 shows that the MD and RRM domain are held together strongly by hydrogen bonds between side chain of Asn404 and backbone carbonyl of Tyr223, salt bridges between side chains of Glu480 and Arg325. In addition, a network of interactions between the side chain of Glu392 and backbone amide, side chain of Ser318 and Ala400 backbone is also formed. Interactions between the catalytic domain and the middle domain occur at two interfaces, as shown in insets 3 and 4. The first interface is formed by hydrogen bonds between the sidechain of Arg211 and backbone carbonyl of Gly92, side chain of Lys214 and backbone carbonyl of Val93. The second interface involves a number of interactions mediated via the helix  $\alpha_6$  of the NTD. Hydrogen bonds are formed between the side chains of Lys274 and Gln195, side chain of Gln244 and backbone carbonyl of Leu199, side chains of Glu277 and Asn173, backbone carbonyl of Tyr306 and side chain of Arg191. Hydrogen bonds are represented by red dotted lines. (B) Superposition of Pla1<sub>FL</sub> and Pla1 <sub>$\Delta$ 14</sub> crystal structures based on alignment of the MD. Pla1<sub>FL</sub> NTD, MD and RRM domain are shown in green, purple and blue, respectively while Pla1 <sub>$\Delta$ 14</sub> is shown in cyan. Displacement of the NTD and RRM domains is shown with arrows.

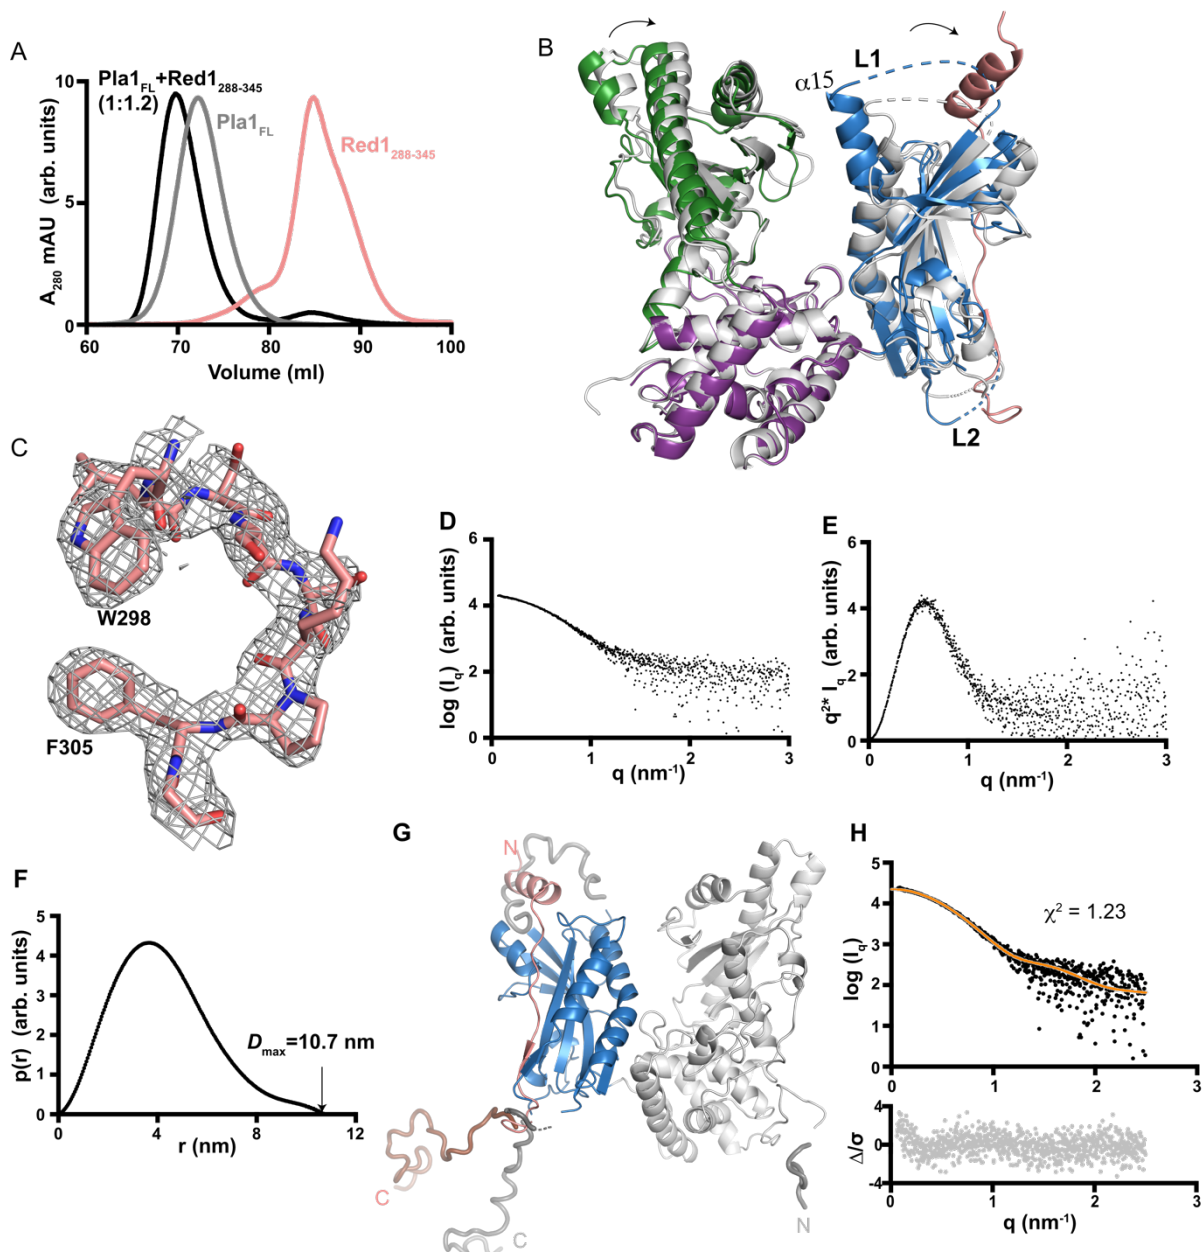

### Supplementary Figure 5. Assembly Pla1-Red1 complex

(A) Size-exclusion chromatography profiles of Red1<sub>288-345</sub> (salmon), Pla1<sub>FL</sub> (grey) and Pla1<sub>FL</sub>+Red1<sub>288-345</sub> (molar ratio 1:1.2 of Pla1<sub>FL</sub>: Red1<sub>288-345</sub>, shown in black). A marked change in the retention volume of the Pla1<sub>FL</sub>+Red1<sub>288-345</sub> complex compared to the free Pla1<sub>FL</sub> and Red1<sub>288-345</sub> is observed. arb. units represent arbitrary units. (B) Structure superposition of Pla1<sub>FL</sub> and Pla1<sub>FL</sub>+Red1<sub>288-345</sub> complex based on alignment of the MD shows a clockwise displacement of NTD and RRM domains as marked by arrows. (C) 2Fo-Fc map of Pla1-Red1 complex with Red1 residues

Trp298-Phe305 contoured at  $1\sigma$  shown. (D) SAXS profile plotted as  $\log(I_q)$  versus  $q$  (E) kratky plot and (F) pairwise distribution  $p(r)$  curve of Pla1<sub>FL</sub>+Red1<sub>288-345</sub> complex are presented. arb. units represent arbitrary units. (G) Structure model of Pla1<sub>FL</sub>+Red1<sub>288-345</sub> complex generated using CORAL<sup>3</sup> to model residues (represented as tubes) disordered in the crystal structure. The NTD and MD are shown in grey while the RRM domain and Red1 are shown in blue and salmon, respectively. (H) Fitting between experimental SAXS and back-calculated SAXS profiles of the Pla1<sub>FL</sub>+Red1<sub>288-345</sub> complex model generated from CORAL as calculated using CRY SOL<sup>4</sup> and the  $\chi^2$  fitting-value of 1.23 are reported. The error weighted residual difference plot is shown at the bottom.

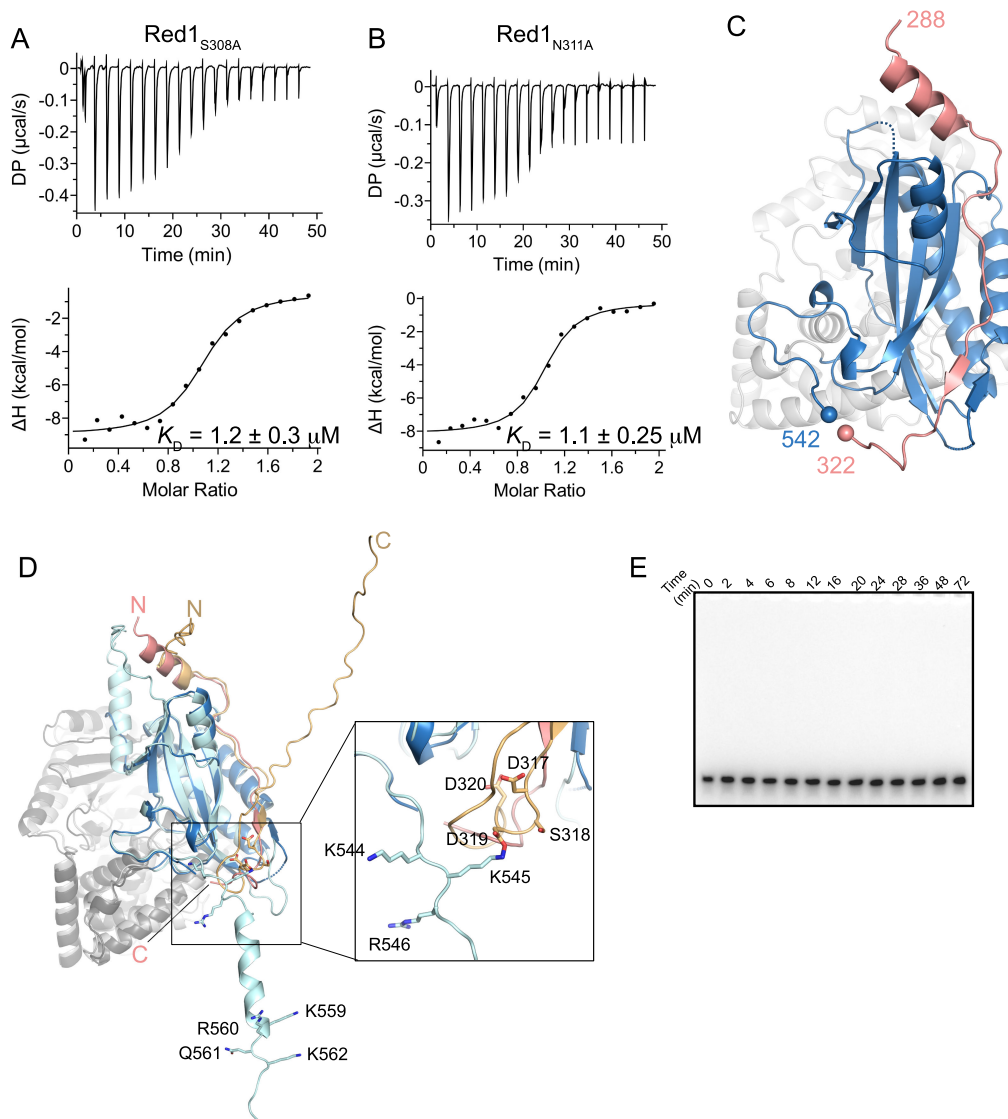

### Supplementary Figure 6. Mutational analysis of Pla1-Red1 complex

(A) and (B) Isothermal titration calorimetry experiments with specific point mutants S308A and N311A of Red1<sub>288-345</sub> serially titrated into Pla1<sub>RRM</sub> domain, respectively. The calculated dissociation constant ( $K_D$ ) from an average of two independent measurements is shown. (C) Spatial proximity between the C $_{\alpha}$  atoms of Pla1 residue Ala542 and Red1 residue Gly322 which are the last residues at the C-termini of the proteins visible in the crystal structure of the complex are shown as spheres and the distance between them is 3.5 Å. (D) Structure superposition of Pla1-Red1 complex (this study, Pla1<sub>NTD</sub> and Pla1<sub>MD</sub> in light gray, Pla1<sub>RRM</sub> in blue and Red1 in salmon) and the top-ranking model (Pla1<sub>NTD</sub> and Pla1<sub>MD</sub> in dark gray, Pla1<sub>RRM</sub> in cyan and

Red1 in wheat) predicted using ColabFold<sup>5</sup> is shown. Zoomed-in view shows that Pla1 residues K544/K545/R546 are spatially close to Red1 residues D317/S318/D319/D320, in line with our in vitro experiments (Figure 3F). (E) Polyadenylation of a 5'-Cy3 labeled A<sub>15</sub> RNA primer by a catalytic mutant of Pla1 (D153A) analyzed by 14% denaturing urea PAGE at different time points. A representative gel from two independent experiments is shown.

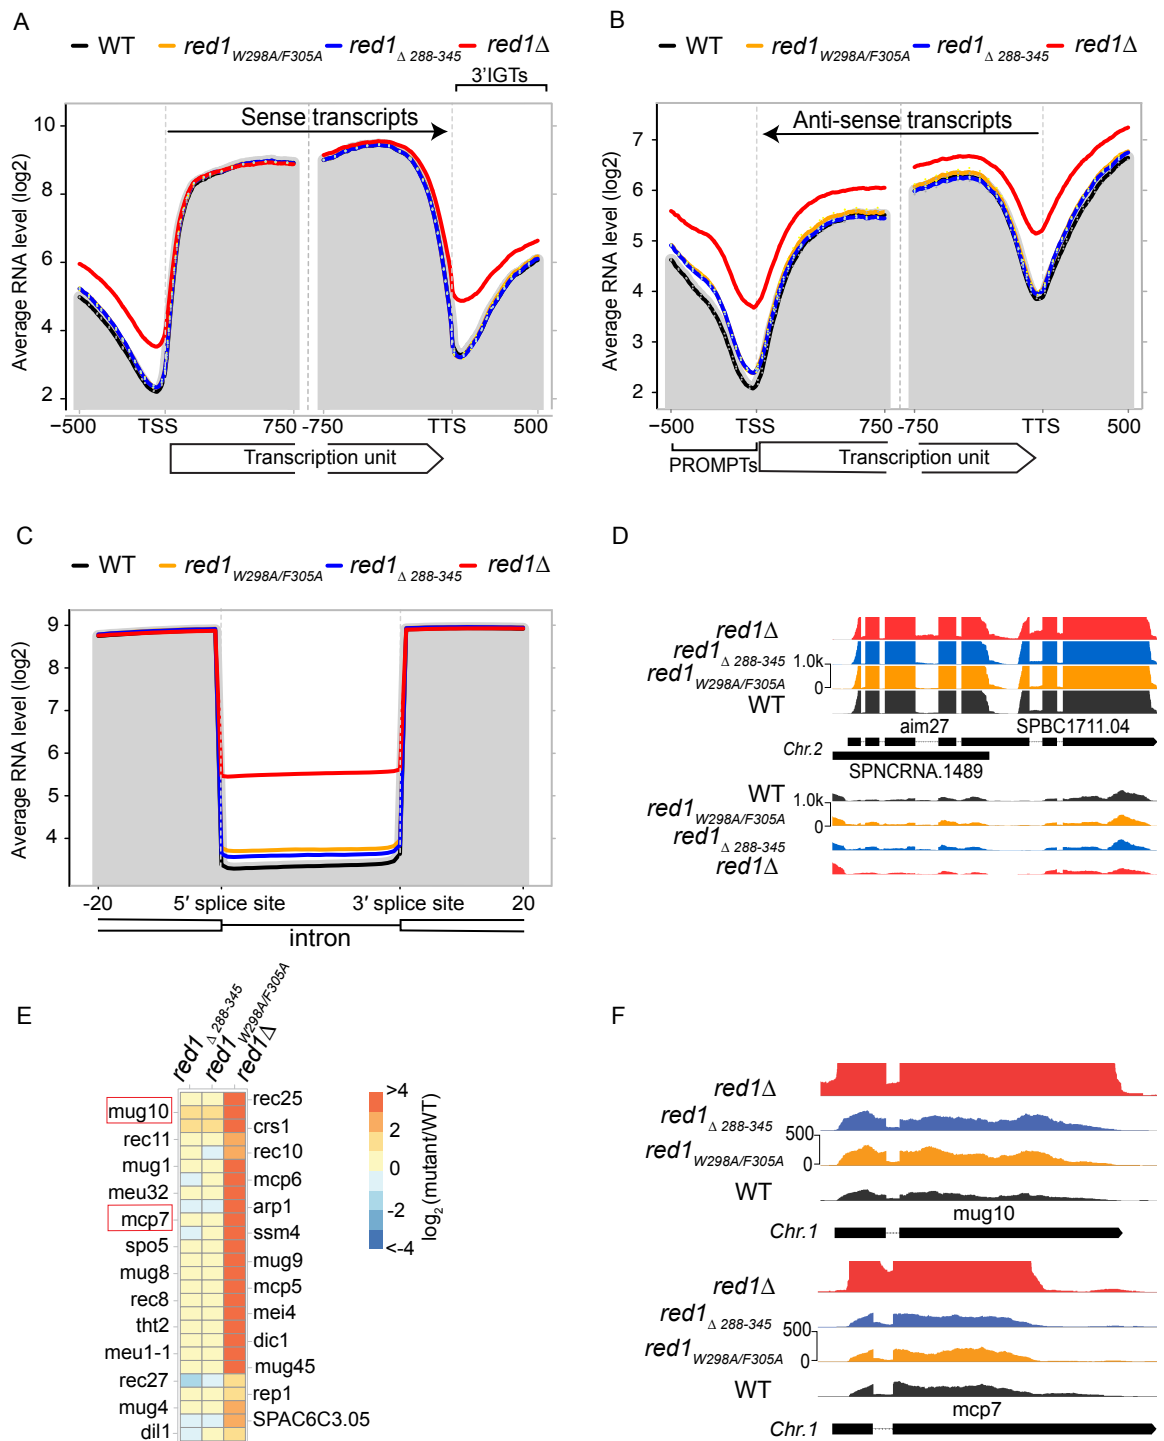

**Supplementary Figure 7. Pla1 in the context of the MTREC complex is responsible for degradation of PROMPTs.**

(A and B) Metagene profile of sense (A) and antisense (B) RNA levels in the indicated strains for all of *S. pombe* genes. The plots represent the geometric average RNA levels from 500bp upstream to 750bp downstream of the transcription start site (TSS)

and 750bp upstream to 500bp downstream of the transcription termination site (TTS). Solid lines represent the average of two replicates for all indicated strains, with the exception of *red1* $\Delta$  which represent a single dataset. Dotted lines represent the individual biological replicates. The grey shading represents the average RNA levels in the WT strain. (C) Metagene profile of sense RNA levels in the indicated strains for all of *S. pombe* introns. The plots represent the geometric average of RNA values from 20bp upstream to 20bp downstream of annotated introns, with the intronic regions scaled to the same lengths for all introns (stretched or condensed). The grey shading represents the average RNA levels in the WT strain. (D) Strand-specific RNA-seq read coverage of a representative set of genes containing multiple introns, in WT and mutant strains. (E) Heat map representation of changes in RNA levels for the meiotic gene cluster in indicated mutant strains compared to WT ( $\log_2$  scale). (F) Strand-specific RNA-seq read coverage of a representative set of meiotic genes (Mug10, Mcp7) in WT and mutant strains.

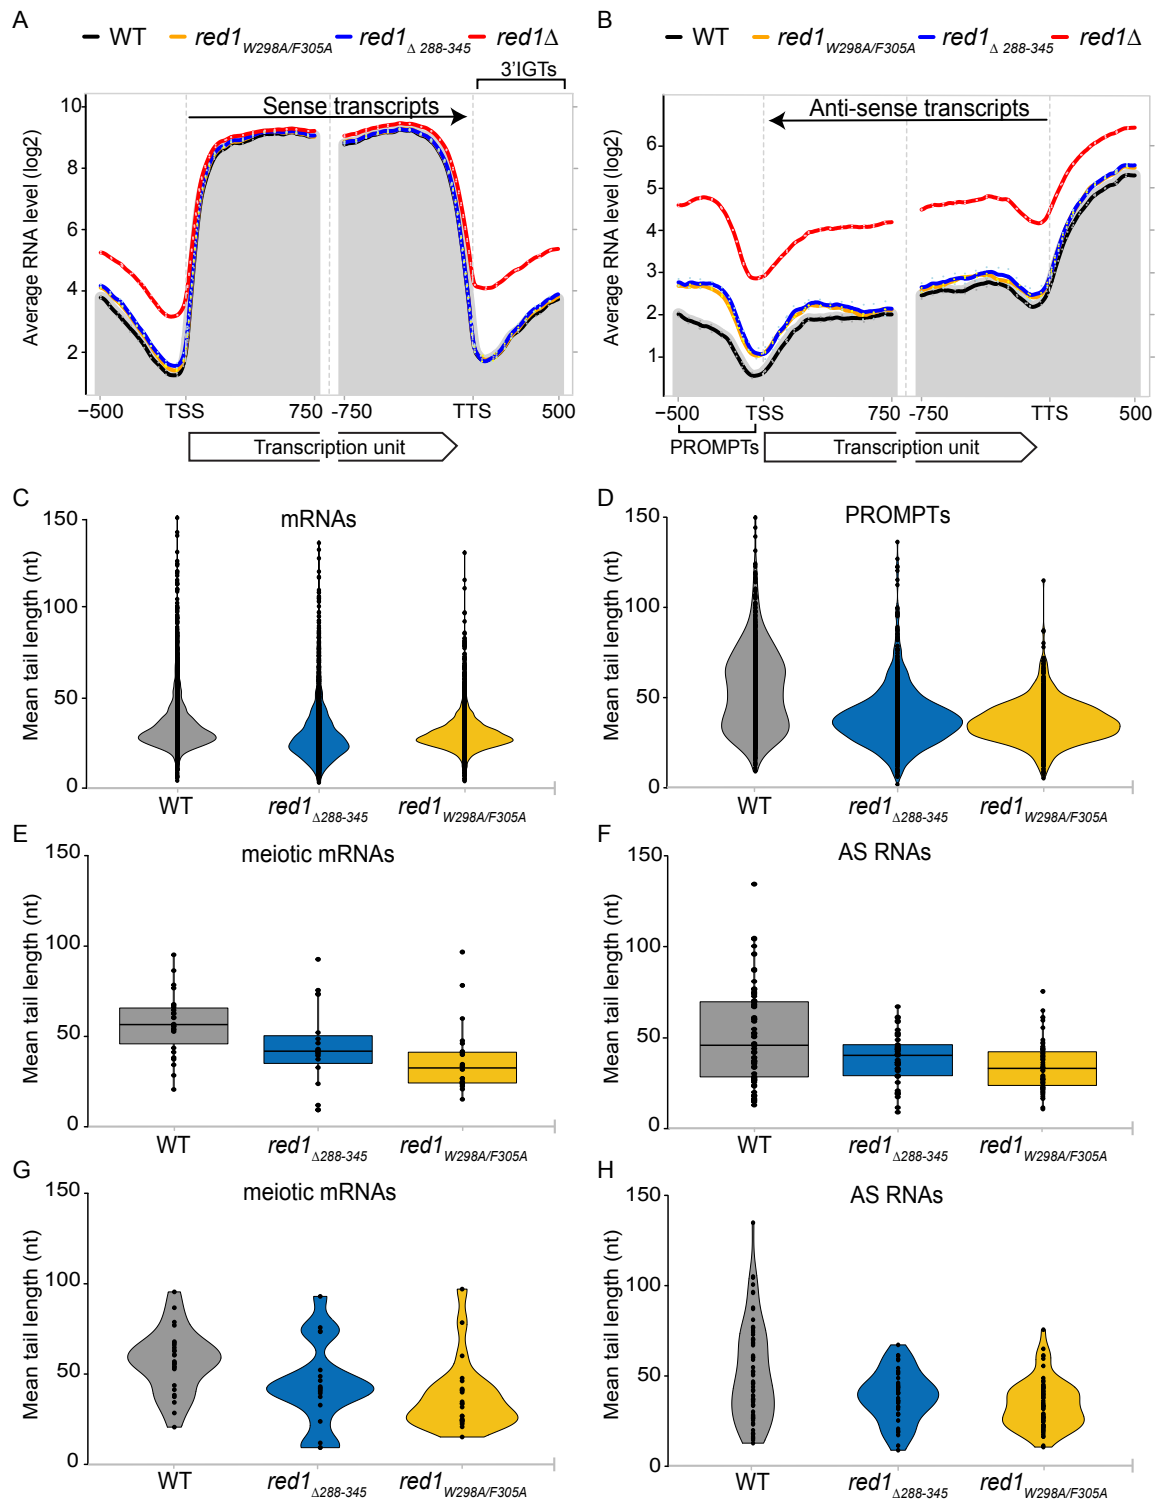

**Supplementary Figure 8. Pla1 in the context of the MTREC complex is responsible for extending the poly(A) tail of CUTs.**

(A and B) Metagenes profile of sense (A) and antisense (B) RNA levels in the indicated strains for a subset of *S. pombe* genes with detectable levels of PROMPTs (2400 genes). The strand-specific total RNA seq experiments were carried out without

poly(A) selection, using random hexamers for reverse transcription (see details in Methods section). The plots represent the geometric average RNA levels from 500bp upstream to 750bp downstream of the transcription start site (TSS) and 750bp upstream to 500bp downstream of the transcription termination site (TTS). Solid lines represent the average of two replicates for all indicated strains. Dotted lines represent the individual biological replicates. The grey shading represents the average RNA levels in the WT strain. (C and D) Violin-plot of mean poly(A) tail length distribution of MTREC-associated mRNAs (C) and PROMPTs (D) for the WT and indicated mutant strains. Dots represent the mean poly(A) tail length of individual mRNAs/PROMPTs. (E-H) Box-plots (E,F) and Violin-plots (G, H) of mean poly(A) tail length distribution of MTREC-associated meiotic mRNAs (E, G) and AS RNAs (F, H) for the WT and indicated mutant strains. Dots represent the mean poly(A) tail length of individual meiotic mRNAs/AS RNAs, boxes represent the 25-75 percentile range and the lines represent the median values. Upper and lower whiskers represent 75th percentile plus 1.5 times the inter-quartile distance (IQR) and the 25th percentile minus 1.5IQR, respectively. 5,135 annotated mRNAs, 26 meiotic genes, 619 PROMPTs (FC>2) and 85 AS RNAs (FC>2) are shown. Source data are provided in Source Data file.

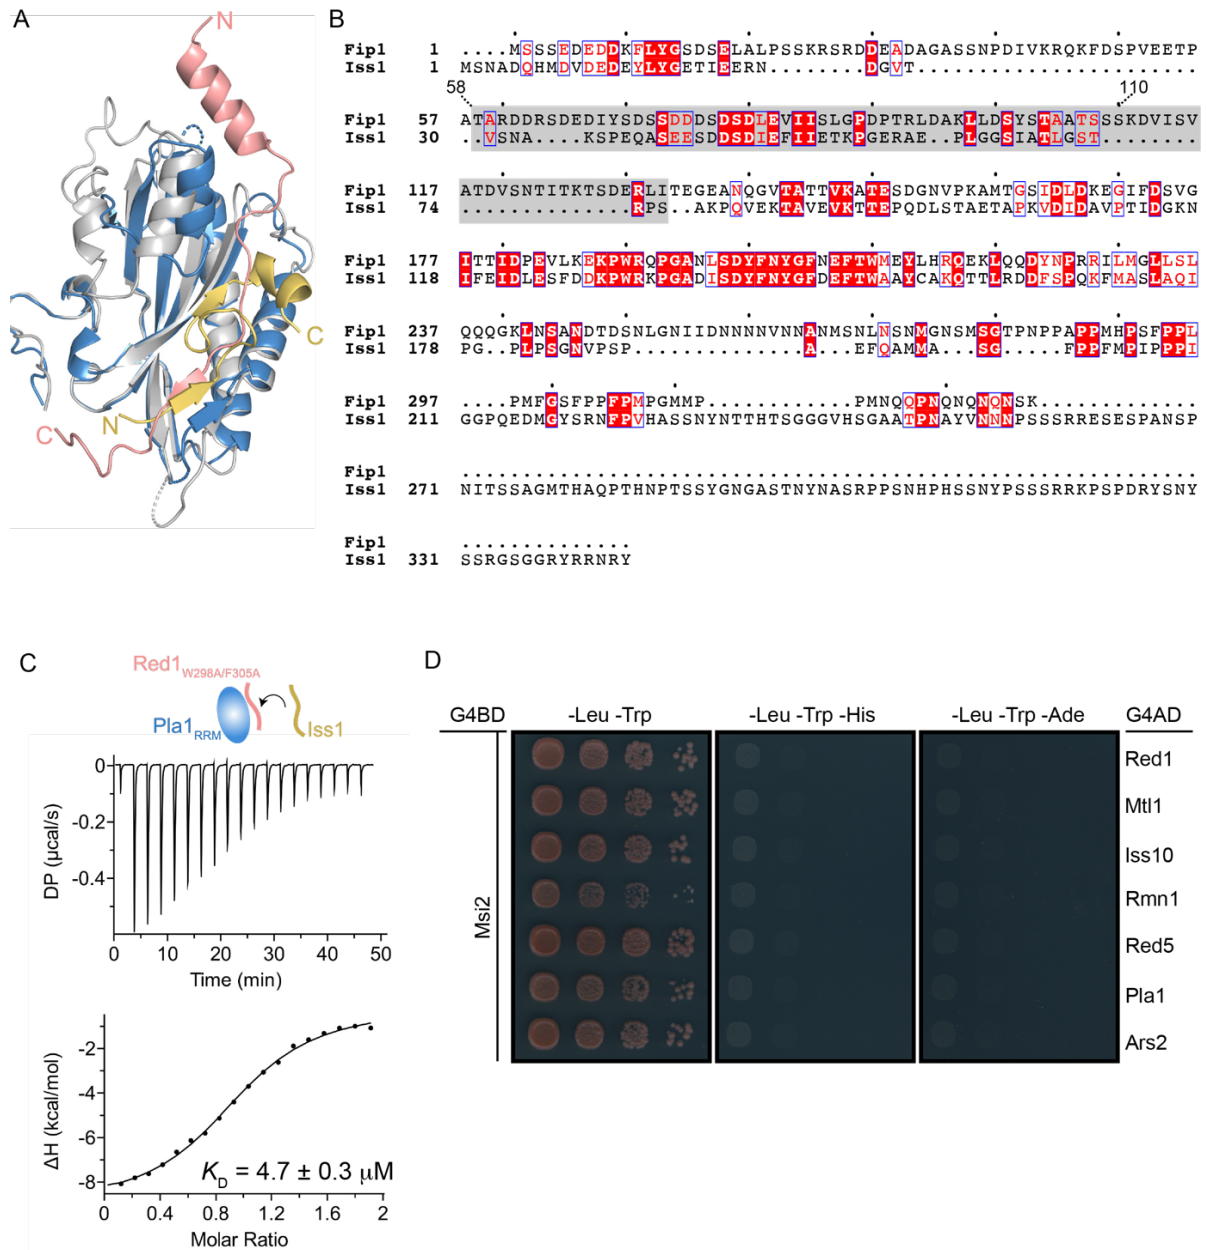

### Supplementary Figure 9. Interaction between MTREC and CPF

(A) Structure superposition of *S. cerevisiae* Pap1 (grey) - Fip1 (dark yellow) complex (PDB ID: 3C66) and Pla1 (blue) - Red1 (salmon) complex. Only the RRM domains of Pap1 and Pla1 are shown. (B) Sequence alignment between Fip1 and Iss1. Residues which are identical are highlighted in red while those that are highly similar are colored in red and boxed in blue. Fip1 residues 58-110 shown to be important for binding to Pap1 in *S. cerevisiae*<sup>6</sup> are marked and the corresponding Iss1 residues

30-76 are marked in grey. (C) ITC titration of Red1<sub>288-345</sub> into a pre-formed complex of Pla1<sub>RRM</sub>-Iss1. The calculated dissociation constants ( $K_D$ ) from an average of two independent measurements are shown. (D) Y2H experiments do not show interaction between Msi2 and MTREC components apart from Mmi1 and Pab2-related to Figure 7F.

**Supplementary Table 1. Summary of dissociation constants measured by ITC**

| Cell                                                         | Syringe                                | KD ( $\mu$ M)   | N value      | No. of experiments |
|--------------------------------------------------------------|----------------------------------------|-----------------|--------------|--------------------|
| Pla1 <sub>RRM</sub>                                          | Red1 <sub>288-345</sub>                | 1.56 $\pm$ 0.24 | 1.05         | 3                  |
|                                                              |                                        | 1.15 $\pm$ 0.3  | 0.952        |                    |
|                                                              |                                        | 1.37 $\pm$ 0.22 | 1.19         |                    |
| Pla1 <sub>RRM</sub>                                          | Red1 <sub>288-322</sub>                | 7.3 $\pm$ 0.1   | 1.3          | 2                  |
|                                                              |                                        | 8.4 $\pm$ 0.1.4 | 1.31         |                    |
| Pla1 <sub>RRM</sub>                                          | Red1 <sub>288-345</sub><br>W298A/F305A | N.D.            | -            | 2                  |
| Pla1 <sub>RRM</sub> K368E                                    | Red1 <sub>288-345</sub>                | 15.3 $\pm$ 3.08 | 0.8          | 2                  |
|                                                              |                                        | 20.3 $\pm$ 19.7 | 1<br>(fixed) |                    |
| Pla1 <sub>RRM</sub>                                          | Red1 <sub>288-345</sub> V313R          | 15.8 $\pm$ 2.3  | 1.13         | 2                  |
|                                                              |                                        | 19.9 $\pm$ 2.7  | 0.96         |                    |
| Pla1 <sub>RRM</sub>                                          | Red1 <sub>288-345</sub> RSRR           | N.D.            | -            | 2                  |
| Pla1 <sub>RRM</sub> EEQE                                     | Red1 <sub>288-345</sub>                | 3.28 $\pm$ 1.08 | 1.03         | 2                  |
|                                                              |                                        | 2.27 $\pm$ 0.32 | 0.97         |                    |
| Pla1 <sub>RRM</sub> EEE                                      | Red1 <sub>288-345</sub>                | 9.43 $\pm$ 1.9  | 0.86         | 2                  |
|                                                              |                                        | 9.98 $\pm$ 2.23 | 0.94         |                    |
| Pla1 <sub>RRM</sub>                                          | Red1 <sub>288-345</sub> S308A          | 1.01 $\pm$ 0.28 | 1.04         | 2                  |
|                                                              |                                        | 1.45 $\pm$ 0.55 | 1.05         |                    |
| Pla1 <sub>RRM</sub>                                          | Red1 <sub>288-345</sub> N311A          | 0.77 $\pm$ 0.21 | 0.99         | 2                  |
|                                                              |                                        | 1.53 $\pm$ 0.44 | 1.05         |                    |
| Pla1 <sub>RRM</sub>                                          | Iss1                                   | 2.11 $\pm$ 0.12 | 1            | 2                  |
|                                                              |                                        | 2.94 $\pm$ 0.3  | 1            |                    |
| Pla1 <sub>RRM</sub> + Iss1                                   | Red1 <sub>288-345</sub>                | 9.52 $\pm$ 2.83 | 1.11         | 2                  |
|                                                              |                                        | 12.4 $\pm$ 1.67 | 1.82         |                    |
| Pla1 <sub>RRM</sub> + Red1 <sub>288-345</sub>                | Iss1                                   | N.D.            | -            | 2                  |
| Pla1 <sub>RRM</sub> + Red1 <sub>288-345</sub><br>W298A/F305A | Iss1                                   | 4.58 $\pm$ 0.6  | 0.97         | 2                  |
|                                                              |                                        | 4.73 $\pm$ 0.5  | 1            |                    |

**Supplementary Table 2.** SAXS data collection, processing and modeling statistics

| <b>Pla1-Red1 complex</b>                                        |                                       |
|-----------------------------------------------------------------|---------------------------------------|
| <b>Sample details</b>                                           |                                       |
| Source organism                                                 | <i>S. pombe</i>                       |
| Expression organism                                             | <i>E. coli</i>                        |
| Description: sequence<br>(Uniprot ID)+ uncleaved tags<br>Red1   | GAMG + Q9UTR8 (288-245) +<br>GSHHHHHH |
| Pla1                                                            | MKHHHHHHP + Q10295 (1-566)            |
| Extinction coefficient $\epsilon$ ( $M^{-1} \text{ cm}^{-1}$ )  | 84340                                 |
| Molecular mass (kDa)                                            | 72.9                                  |
| <b>Data collection parameters</b>                               |                                       |
| Instrument                                                      | PETRA III, P12 DESY                   |
| Beam geometry ( $\text{mm}^2$ )                                 | $0.2 \times 0.12$                     |
| Wavelength ( $\text{\AA}$ )                                     | 0.124                                 |
| $q$ range ( $\text{nm}^{-1}$ )                                  | 0.00226 - 7.4054                      |
| Exposure time (s)                                               | 7.8s<br>(40×0.195s)                   |
| Temperature ( $^{\circ}\text{C}$ )                              | 20                                    |
| Concentration range measured ( $\text{mg ml}^{-1}$ )            | 0.05 - 1.7                            |
| Concentration used ( $\text{mg ml}^{-1}$ )                      | 0.85                                  |
| <b>Structural parameters</b>                                    |                                       |
| $R_g$ (nm) (from $P(r)$ )                                       | 3.28                                  |
| $R_g$ (nm) (from Guinier)                                       | $3.3 \pm 0.02$                        |
| $D_{\text{max}}$ (nm)                                           | 10.7                                  |
| Porod volume estimate ( $\text{nm}^3$ ) (from $P(r)$ )          | 137.79                                |
| <b>Molecular weight determination (kDa)</b>                     |                                       |
| From volume of correlation ( $V_c$ )                            | 90.7                                  |
| From Bayesian assessment<br>[credibility interval], probability | 91.175<br>[86.95, 95.8], 94.6%        |
| Calculated $MW$ from sequence                                   | 73                                    |
| <b>Software employed</b>                                        |                                       |
| Primary data reduction                                          | SASFLOW                               |
| Data processing                                                 | PRIMUS                                |
| Flexibility modeling                                            | CORAL                                 |

|                                  |          |
|----------------------------------|----------|
| Computation of model intensities | CRY SOL  |
| 3D graphics representations      | PY MOL   |
| <hr/>                            |          |
| <b>Data deposition ID</b>        |          |
| Pla1-Red1 complex                | SAS DKE6 |
| <hr/>                            |          |

### Supplementary Table 3: BLI kinetics experiments

| Biotinylated ligand     | Analyte            | $K_D$ (nM) | $k_{on}$ (1/Ms)        | $k_{off}$ (1/s)         | $\chi^2$ | $R^2$ |
|-------------------------|--------------------|------------|------------------------|-------------------------|----------|-------|
| Red1 <sub>288-345</sub> | Pla1 <sub>FL</sub> | 59.2±0.    | 2.75*10 <sup>5</sup> ± | 1.63*10 <sup>-2</sup> ± | 2.43     | 0.994 |
|                         |                    | 57         | 2.6*10 <sup>3</sup>    | 2.9*10 <sup>-5</sup>    |          |       |
| Iss1                    | Pla1 <sub>FL</sub> | 115.2±1    | 2.1*10 <sup>5</sup> ±  | 2.42*10 <sup>-2</sup> ± | 1.84     | 0.994 |
|                         |                    | .6         | 2.8*10 <sup>3</sup>    | 5.8*10 <sup>-5</sup>    |          |       |

### Supplementary Table 4: *E. coli* expression, yeast two hybrid plasmids and yeast strains used in this study

| <i>E. coli</i> expression plasmids |                             |           |              |
|------------------------------------|-----------------------------|-----------|--------------|
| Plasmid No.                        | Name                        | Selection | Reference    |
| ND766                              | pET_His-spPla1-1-566        | Kan       | this study   |
| ND788                              | pET_His-spPla1-1-542        | Kan       | this study   |
| ND1119                             | pET_His-1a-spPla1-352-566   | Kan       | this study   |
| ND940                              | pET_Gb1_CHis-spRed1-240-345 | Amp       | this study   |
| ND953                              | pET_Gb1_CHis-spRed1-288-345 | Amp       | this study   |
| ND954                              | pET_Gb1_CHis-spRed1-288-322 | Amp       | this study   |
| ND82                               | pET_MBP_1a-EYFP             | Kan       | Gunter Stier |
| ND769                              | pET21d_spPla1-352-566       | Amp       | this study   |
| ND775                              | pET_MBP_1a- spRed1-240-345  | Kan       | this study   |
| ND809                              | pET_MBP_1a- spRed1-259-288  | Kan       | this study   |
| ND810                              | pET_MBP_1a- spRed1-288-322  | Kan       | this study   |
| ND811                              | pET_MBP_1a- spRed1-288-345  | Kan       | this study   |
| Rp01                               | pET_Gb1_CHis-spRed1-RSRR    | Amp       | this study   |
| Rp02                               | pET_Gb1_CHis-spRed1-S308A   | Amp       | this study   |

|      |                           |     |            |
|------|---------------------------|-----|------------|
| Rp04 | pET_Gb1_CHis-spRed1-WFAA  | Amp | this study |
| Rp05 | pET_Gb1_CHis-spRed1-N311A | Amp | this study |
| Rp10 | pET_His-1a-spPla1-EEQE    | Kan | this study |
| Rp11 | pET_His-1a-spPla1-EEE     | Kan | this study |
| Rp12 | pET_His-spPla1-D153A      | Kan | this study |
| Rp17 | pET_Gb1_CHis-spRed1-V313R | Amp | this study |
| Rp18 | pET_His-1a-spPla1-K368E   | Kan | this study |

---

### Yeast two hybrid plasmids

| Plasmid No. | Name | Selection | Reference |
|-------------|------|-----------|-----------|
|-------------|------|-----------|-----------|

|       |                          |     |                            |
|-------|--------------------------|-----|----------------------------|
| ND333 | pGBKT7                   | Kan | Dobrev et al. <sup>7</sup> |
| ND334 | pGADT7                   | Amp | Dobrev et al. <sup>7</sup> |
| ND368 | pGADT7-spRed1_1-712      | Amp | Dobrev et al. <sup>7</sup> |
| ND370 | pGADT7-spMtl1_1-1030     | Amp | Dobrev et al. <sup>7</sup> |
| ND435 | pGADT7 -spRed5_1-376     | Amp | Dobrev et al. <sup>7</sup> |
| ND436 | pGADT7 -spIss10_1 -551   | Amp | Dobrev et al. <sup>7</sup> |
| ND437 | pGADT7 -spMmi1_1-488     | Amp | Dobrev et al. <sup>7</sup> |
| ND438 | pGADT7 -spPab2_1 -166    | Amp | Dobrev et al. <sup>7</sup> |
| ND439 | pGADT7 -spRmn1_1 -590    | Amp | Dobrev et al. <sup>7</sup> |
| Rp19  | pGADT7 -spPla1_1 -566    | Amp | this study                 |
| Rp20  | pGADT7 -spArs2_1-609     | Amp | this study                 |
| Rp21  | pGBKT7 -spMsi2_1 -474    | Kan | this study                 |
| Rp15  | pGADT7-spRed1_1-712-WFAA | Amp | this study                 |
| Rp16  | pGADT7-spRed1_del288-345 | Amp | this study                 |

---

### Yeast strains

| Strain No. | Name | Relevant Genotype | Reference |
|------------|------|-------------------|-----------|
|------------|------|-------------------|-----------|

|      |    |                                              |  |
|------|----|----------------------------------------------|--|
| P419 | WT | <i>MatMsmt0, leu1-32, ura4-D18, ade6-216</i> |  |
|------|----|----------------------------------------------|--|

|       |                                       |                                                                                                  |                        |
|-------|---------------------------------------|--------------------------------------------------------------------------------------------------|------------------------|
| P1    | WT                                    | <i>MatMsmt0, leu1-32, ura4 DS/E, ade6-210, his2, Otr1R:: Ura4 (SphI)</i>                         |                        |
| P344  | WT                                    | <i>h+, HIS, leu1-32, ade6-210, ura4-D18</i>                                                      | V2-33-H12, Bioneer Inc |
| F3230 | Red1 (WT)                             | <i>MatMsmt0, leu1-32, ura4-D18 ade6-M210, Red1:: natNT2 (+3'UTR)</i>                             | this study             |
| F3232 | <i>red1<sub>W298A/F305A</sub></i>     | <i>MatMsmt0, leu1-32, ura4-D18 ade6-M210/M216, Red1<sub>W298A/F305A</sub> :: natNT2 (+3'UTR)</i> | this study             |
| F3436 | <i>red1<sub>Δ288-345</sub></i>        | <i>MatMsmt0, leu1-32, ura4-D18, ade6-M210, Red1<sub>Δ288-345</sub> :: natNT2 (+3'UTR)</i>        | this study             |
| F3237 | <i>red1Δ</i>                          | <i>MatMsmt0, leu1-32, ura4-D18, ade6-M210, red1Δ:: kanMX6</i>                                    | this study             |
| F3269 | Red1-FTP                              | <i>MatMsmt0, leu1-32, ura4-D18, ade6-M216, Red1-3xFTP:: hyg</i>                                  | this study             |
| F3271 | <i>red1<sub>W298A/F305A</sub>-FTP</i> | <i>MatMsmt0, leu1-32, ura4-D18, ade6-M210, Red1<sub>W298A/F305A</sub>-3xFTP::hyg</i>             | this study             |
| F3273 | <i>red1<sub>Δ288-345</sub>-FTP</i>    | <i>MatMsmt0, leu1-32, ura4-D18, ade6-M216, Red1<sub>Δ288-345</sub>-3xFTP::hyg</i>                | this study             |
| F3043 | Red1-FTP                              | <i>h90, leu1-32, ura4-D18, ade6-M210, Red1- 3xFTP::hyg.</i>                                      | this study             |
| F3197 | <i>red1<sub>W298A/F305A</sub>-FTP</i> | <i>h90, leu1-32, ura4-D18, ade6-M210 Red1<sub>W298A/F305A</sub>-3xFTP::hyg.</i>                  | this study             |

|       |                                                 |                                                                                                                                   |            |
|-------|-------------------------------------------------|-----------------------------------------------------------------------------------------------------------------------------------|------------|
| F3199 | <i>red1<sub>Δ288-345</sub>-FTP</i>              | <i>h90, leu1-32, ura4-D18</i><br><i>ade6-M210, Red1<sub>Δ288-345</sub>-</i><br><i>3xFTP::hyg.</i>                                 | this study |
| F3203 | Pla1-HA                                         | <i>h+, HIS, leu1-32, ade6-210,</i><br><i>ura4-D18</i><br><i>Pla1-3xHA::kanMX6</i>                                                 | this study |
| F3205 | Red1-FTP; Pla1-HA                               | <i>h90, leu1-32, ura4-D18, ade6-</i><br><i>M210</i><br><i>Red1-3xFTP::hyg; Pla1-</i><br><i>3xHA::kanMX6</i>                       | this study |
| F3207 | <i>red1<sub>W298A/F305A</sub>-FTP</i> ; Pla1-HA | <i>h90, leu1-32, ura4-D18, ade6-</i><br><i>M210</i><br><i>Red1<sub>W298A/F305A</sub>-3xFTP::hyg;</i><br><i>Pla1- 3xHA::kanMX6</i> | this study |
| F3209 | <i>red1<sub>Δ288-345</sub>-FTP</i> ; Pla1-HA    | <i>h90, leu1-32, ura4-D18, ade6-</i><br><i>M210</i><br><i>Red1<sub>Δ288-345</sub>-3xFTP::hyg; Pla1-</i><br><i>3xHA::kanMX6</i>    | this study |

### Supplementary Table 5: Primers used in this study

| Primer No. | Name                            | Sequence (5'→3')                               |
|------------|---------------------------------|------------------------------------------------|
| ND342      | <i>spPla1-NcoI-FW</i>           | TATACCATGGGTACTACCAAGCAATGGGGTATTACAC          |
| ND343      | <i>spPla1-BamHI-RE</i>          | TATAGGATCCTTATGCCGTTGAACTTTTTGTCGTTTTA<br>ATTG |
| ND432      | <i>spPla1-352-NcoI-FW</i>       | TATACCATGGACTTTTTTCATCGTTATAAGCATTATC          |
| ND433      | <i>spPla1-352-XhoI-RE</i>       | TATACTCGAGTTAGTCGTGTTTTTGAACAAAGCTGAC          |
| N748       | <i>spPla1-542-STOP-BamHI-RE</i> | TATAGGATCCTTAAGCTTTCGGCCGTTCTTCTCC             |

|      |                               |                                                                           |
|------|-------------------------------|---------------------------------------------------------------------------|
| N620 | <i>spRed1_288-FW-GA-BamHI</i> | GAAGAACGGCCGAAAGCTGGTGGTTCTGGCGGTTCCA<br>TATCTTTACCACTTTTGAAGCAGG         |
| N619 | <i>SpRed1_345-RE-GA-BamHI</i> | GTCAGTGGTGGTGGTGGTGGTGGGATCCATTTTCACTA<br>TTTGAGGGGG                      |
| N621 | <i>SpRed1_322-RE-GA-BamHI</i> | GTCAGTGGTGGTGGTGGTGGTGGGATCCATCATCATC<br>GGAATCAAATTCAATAAC               |
| KS1  | <i>spRed1_F305A_FP</i>        | CGATTGGCTATCTTCTTGAAGCCTGCTGGCTCCTCGA<br>C                                |
| KS2  | <i>spRed1_F305A_RP</i>        | AGTCGAGGAGCCAGCAGGCTTCGAAGAAGATAGCCAA<br>TCG                              |
| KS3  | <i>spRed1_W298A_FP</i>        | CCACTTTTGAAGCAGGACGATGCGCTATCTTCTTCGAA<br>GC                              |
| KS4  | <i>spRed1_W298A_RP</i>        | CTTCGAAGAAGATAGCGCATCGTCCTGCTTCAAAGTG<br>G                                |
| KS5  | <i>spRed1_N311A_FP</i>        | GCCTTTTGGCTCCTCGACTCCAGCTGTAGTTATTGAAT<br>TTGATTC                         |
| KS6  | <i>spRed1_N311A_RP</i>        | GAATCAAATTCAATAACTACAGCTGGAGTCGAGGAGCC<br>AAAAGGC                         |
| KS7  | <i>spRed1_D317RRR_FP</i>      | CTTTTGGCTCCTCGACTCCAAATGTAGTTATTGAATTC<br>GTTCCCGTCGTGATGGAGATGACTTTTTCGA |
| KS8  | <i>spRed1_D317RRR_RP</i>      | TCGAAAAGTCATCTCCATCACGACGGGAACGAAATTCA<br>ATAACTACATTTGGAGTCGAGGAGCCAAAAG |
| KS9  | <i>spRed1_S308A_FP</i>        | CGAAGCCTTTTGGCTCCGCGACTCCAAATGTAGTT                                       |
| KS10 | <i>spRed1_S308A_RP</i>        | AACTACATTTGGAGTCGCGGAGCCAAAAGGCTTCG                                       |
| KS11 | <i>spPla1-K368E-RP</i>        | GAGCTTCAGCTGTCTCAGCAGCTGCTGTGATCG                                         |
| KS12 | <i>spPla1-K368E-FP</i>        | CGATCACAGCAGCTGCTGAGACAGCTGAAGCTC                                         |
| KS13 | <i>spPla1_EEE_FP</i>          | AAGAACGGCCGAAAGCTACTGAGGAGGAGTCCACTGC<br>TGACACTGCAC                      |
| KS14 | <i>spPla1_EEE_RP</i>          | GTGCAGTGTGAGCAGTGGACTCCTCCTCAGTAGCTTTC<br>GGCCGTTCTT                      |

|      |                                      |                                                                    |
|------|--------------------------------------|--------------------------------------------------------------------|
| KS15 | <i>spPla1_EEQE_BamHI_RP</i>          | CATGTCGGATCC TTA<br>TGCCGTTGAAACTTCTTGTTCTTCTAATTGCTCTGTACT<br>ATG |
| KS16 | <i>spPla1_352_NcoI_FP</i>            | GAGACTACC ATGG<br>ACTTTTTTCATCGTTATAAGCATTATCTTAC                  |
| KS17 | <i>spPla1_D153A_FP</i>               | AGTTTAAATTTTTGGGAATAAGTATAGCTTTAATTTTTGC<br>TCGTCTTTCAGTTCC        |
| KS18 | <i>spPla1_D153A_RP</i>               | GGAAGTCAAAGACGAGCAAAAATTAAGCTATACTTATT<br>CCCAAAAATTTAAACT         |
| KS19 | <i>spRed1-V313R-RP</i>               | CATCGGAATCAAATTC AATACGTACATTTGGAGTCGAG<br>GAGCC                   |
| KS20 | <i>spRed1-V313R-FP</i>               | GGCTCCTCGACTCCAAATGTACGTATTGAATTTGATTC<br>CGATGA                   |
| KS21 | <i>spIss1-30-NcoI-FP</i>             | GAGACTACC ATG G TGTC AAATGCCA AGTCACCAGA                           |
| KS22 | <i>spIss1-76-BamHI-RP</i>            | TATAGGATCCTTAAGAAGGTCGGGTTGAACCTAATGTT                             |
| KS23 | <i>spRed1-del288-345-RP</i>          | GTAATCTGAACGAGACATAGTAAGAAGATTTTTTCTTTC<br>AGGAAGGACG              |
| KS24 | <i>spRed1-del288-345-FP</i>          | CGTCCTTCCTGAAAGAAAAATCTTCTTACTATGTCTCG<br>TTCAGATTAC               |
| KS25 | <i>spMsi2_NcoI_FW-GBKT7--<br/>GA</i> | AGGAGGACCTGCATATGGCCATGGGCGGCTCTGATTT<br>TGAAGATG                  |
| KS26 | <i>spMsi2_BamHI_RE-GBKT7-<br/>GA</i> | TGCAGGTCGACGGATCCTTATCGACGATATGGATGGAA<br>GCTGTGCC                 |
| KS27 | <i>spPla1_NcoI_FW-ADT7-GA</i>        | GGCGAGCGCCGCCATGACTACCAAGCAATGGGGTATT<br>ACAC                      |
| KS28 | <i>spPla1_BamHI_RE-ADT7-<br/>GA</i>  | GCAGCTCGAGCTCGATGGATCCTTATGCCGTTGAAACT<br>TTTTGTCGTTTTAATTG        |

|       |                                       |                                                            |
|-------|---------------------------------------|------------------------------------------------------------|
| KS29  | <i>spArs2_NcoI_FW-ADT7-GA</i>         | GGCGAGCGCCGCCATGGCTAGTGAGGTCCATCAAGAA<br>AG                |
| KS30  | <i>spArs2_BamHI_RE-ADT7-GA</i>        | GCAGCTCGAGCTCGATGGATCCTTAGTAATCTAATTCT<br>GGAACCTCCTGGTTAG |
| AN77  | <i>spRed1_For_F305A</i>               | GCGCTATCTTCTTCGAAGCCTGCTGGCTCCTCGACTCC<br>AAATG            |
| AN78  | <i>spRed1_Rev_W298A</i>               | GCAGGCTTCGAAGAAGATAGCGCATCGTCCTGCTTCAA<br>AAGTGG           |
| AN80  | <i>spRed1_For_Nhe1 site</i>           | CGGACTGGATTCTCTTCTGCTAGCTCCCAAGGAAGTC<br>TGAC              |
| AN70  | <i>spRed1-Pla1 DEL_Rev_first frag</i> | CTGAACGAGACATAGTAAGACCAAGATTTTTCTTTTCAG<br>GAAGG           |
| AN81  | <i>spRed1_Rev with Kpn1 site</i>      | GATATAATCGACAAGCGGTACCTTATCCTCAAATCTGT<br>TTCCGTC          |
| AN82  | <i>spRed1_For DEL sec_frag.</i>       | CGTCCTTCTGAAAGAAAAATCTTGGTCTTACTATGTC<br>TCGTTTCAG         |
| AN62  | <i>spRed1_Fw_above 400bp</i>          | CGCTTGTCGATTATATCTCTC                                      |
| AN63  | <i>spRed1_Rev_natNT2OH</i>            | CGTCGACCTGCAGCGTACGTTATCAATAACCATTGAAA<br>TG               |
| AN64  | <i>spRed1_Fw_Clonat Overhang</i>      | CGAGCTCGAATTCATCGATAAATGCGCGTATTGTAATA<br>AG               |
| AN65  | <i>spRed1_Rev. 500bp after.</i>       | GTTTGGAAGATGGTTTACGCCTAC                                   |
| AN86  | <i>Pla1-3xHA tag first frag._For.</i> | GCTCAACAAGTAGCTAGCGG                                       |
| AN87  | <i>Pla1-3xHA tag first frag._Rev.</i> | GTTAATTAACCCGGGGATCCGTGCCGTTGAAACTTTTT<br>GTC              |
| AN88  | <i>Pla1-3xHA tag sec. frag._For.</i>  | CGAGCTCGAATTCATCGATGTAAATACCCACACATAAG<br>ACTC             |
| AN89  | <i>Pla1-3xHA tag sec. frag._Rev.</i>  | GAACACTCCTAAAGATCCCAAC                                     |
| AN139 | <i>ChIP_check_ura4DS/E#1</i>          | GAGGGGATGAAAAATCCCAT                                       |

|       |                              |                       |
|-------|------------------------------|-----------------------|
| AN140 | <i>ChIP_check_ura4DS/E#2</i> | TTCGACAACAGGATTACGACC |
| AN162 | <i>GAPDH_For.</i>            | AACATCATCCCCTCCTCCAC  |
| AN163 | <i>GAPDH_Rev.</i>            | GCCTTGATGTCCTCGTAGTTG |

---

### Supplementary References:

1. Buchan, D.W.A. & Jones, D.T. The PSIPRED Protein Analysis Workbench: 20 years on. *Nucleic Acids Res* **47**, W402-W407 (2019).
2. Shen, Y., Delaglio, F., Cornilescu, G. & Bax, A. TALOS+: a hybrid method for predicting protein backbone torsion angles from NMR chemical shifts. *J Biomol NMR* **44**, 213-23 (2009).
3. Petoukhov, M.V. et al. New developments in the ATSAS program package for small-angle scattering data analysis. *J Appl Crystallogr* **45**, 342-350 (2012).
4. Franke, D. et al. ATSAS 2.8: a comprehensive data analysis suite for small-angle scattering from macromolecular solutions. *J Appl Crystallogr* **50**, 1212-1225 (2017).
5. Mirdita, M. et al. ColabFold: making protein folding accessible to all. *Nat Methods* **19**, 679-682 (2022).
6. Kumar, A. et al. Dynamics in Fip1 regulate eukaryotic mRNA 3' end processing. *Genes Dev* (2021).
7. Dobrev, N. et al. The zinc-finger protein Red1 orchestrates MTREC submodules and binds the Mtl1 helicase arch domain. *Nat Commun* **12**, 3456 (2021).
